# Supplementary material for: Polyamine modification by acrolein exclusively produces 1,5-diazacyclooctanes: a previously unrecognized mechanism for acrolein-mediated oxidative stress
Source: Royal Society of Chemistry journal article supplement (doi:10.1039/c4ob00761a), 2014-01-01
Supplement: c4ob00761a1.pdf [file c4ob00761a1.pdf]

## Supplementary Information

**Polyamine modification by acrolein exclusively produces 1,5-diazacyclooctanes: A previously unrecognized mechanism for acrolein-mediated oxidative stress**

**Ayumi Tsutsui,<sup>a</sup> Rie Imamaki,<sup>b</sup> Shinobu Kitazume,<sup>b</sup> Shinya Hanashima,<sup>b</sup> Yoshiki Yamaguchi,<sup>b</sup> Masato Kaneda,<sup>c</sup> Shinya Oishi,<sup>c</sup> Nobutaka Fujii,<sup>c</sup> Almira Kurbangalieva,<sup>d</sup> Naoyuki Taniguchi,<sup>b</sup> and Katsunori Tanaka<sup>\*a,d</sup>**

<sup>a</sup>Biofunctional Synthetic Chemistry Laboratory, RIKEN, 2-1 Hirosawa, Wako-shi, Saitama 351-0198, Japan

<sup>b</sup>Systems Glycobiology Research Group, RIKEN-Max Planck Joint Research Center for Systems Chemical Biology, RIKEN Global Research Cluster, RIKEN, 2-1 Hirosawa, Wako-shi, Saitama 351-0198, Japan

<sup>c</sup>Graduate School of Pharmaceutical Sciences, Kyoto University, 46-29 Yoshidashimoadachi-cho, Sakyo-ku, Kyoto 606-8501, Japan

<sup>d</sup>Biofunctional Chemistry Laboratory, A. Butlerov Institute of Chemistry, Kazan Federal University, 18 Kremlyovskaya street, Kazan 420008, Russia

To whom correspondence should be addressed: Katsunori Tanaka, Biofunctional Synthetic Chemistry Laboratory, RIKEN, 2-1 Hirosawa, Wako-shi, Saitama 351-0198, Japan, Tel.: (81) 48-467-9405; Fax: (81) 48-467-9379; E-mail: kotzenori@riken.jp

**Representative procedure of the reaction of a polyamine with acrolein.** To a solution of spermine (**1**) (5.0 mg, 25  $\mu\text{mol}$ ) in either  $\text{CHCl}_3$  or a PBS buffer solution (1.0 mL) was slowly added acrolein (90 %, 1.8  $\mu\text{L}$ , 25  $\mu\text{mol}$ ) at room temperature. After stirring for 15 min at this temperature, the mixture was concentrated *in vacuo* to give **1a** as a white solid (6.0 mg). Direct NMR analysis without purification confirmed the production of **1a** (in about 80%) with byproducts, which mostly consisted of the starting polyamine and polymerized products:  $^1\text{H}$  NMR (400 MHz,  $\text{CDCl}_3$ )  $\delta$  3.17 (m, 2H: This acetal C-H group has  $^1\text{H}$ - $^{13}\text{C}$  HSQC-TOCSY correlations with the neighboring four protons on the eight-membered ring (protons at around 1.6, 1.8, 2.5, and 2.5 ppm) and  $^1\text{H}$ - $^{15}\text{N}$  long range correlations with two tertiary nitrogens on the six-membered ring, see structure **1a** in Supplementary Fig. S1), 3.05-3.02 (m, 4H), 2.50-2.35 (m, 14H), 1.80-1.33 (m, 36H);  $^{13}\text{C}$  NMR (100 MHz,  $\text{CDCl}_3$ ),  $\delta$  75.4, 75.2, 54.1 (2C), 51.9 (2C), 51.1 (2C), 50.8 (2C), 44.9 (2C), 30.9 (2C), 30.1 (2C), 28.3, 28.1, 25.4, 25.1, 24.9; HRESI-MS  $m/z$  calcd for  $\text{C}_{26}\text{H}_{56}\text{N}_8\text{Na}$   $[\text{M}+\text{Na}]^+$  503.4526, found 503.4506. Data for **2a**: HRESI-MS  $m/z$  calcd for  $\text{C}_{30}\text{H}_{61}\text{N}_8\text{O}_2$   $[\text{M}+\text{H}]^+$  565.4918, found 565.4956. Data for **3a**: HRESI-MS  $m/z$  calcd for  $\text{C}_{20}\text{H}_{42}\text{N}_6\text{Na}$   $[\text{M}+\text{Na}]^+$  389.3369, found 389.3355. Data for **4a**: ESI-MS  $m/z$  calcd for  $\text{C}_{18}\text{H}_{41}\text{N}_6$   $[\text{M}+\text{H}]^+$  341.3, found 341.3.

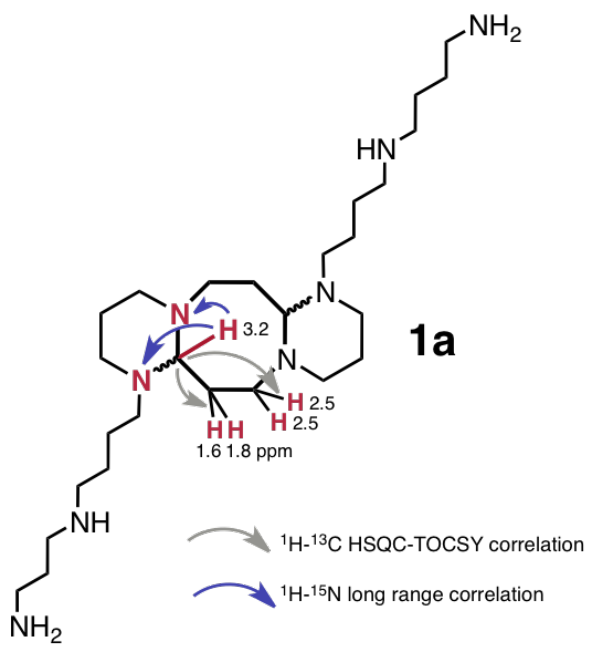

**Fig. S1** <sup>1</sup>H-<sup>13</sup>C HSQC-TOCSY and <sup>1</sup>H-<sup>15</sup>N long range correlations in **1a** (CDCl<sub>3</sub>).

**NMR monitoring of the enzymatic oxidation of 1,5-diazacyclooctane 3a by amine oxidase.** The substrate **3a**, plasma amine oxidase (I.U.B.: 1.4.3.6, Worthington Biochemical Corporation, bovine plasma, 19.5  $\mu$ /mgDW), and PBS buffer were freeze-dried twice from D<sub>2</sub>O prior to use following the procedure reported by Howen and co-workers (ref. 4). The enzymatic reaction was performed at 37 °C, pH 7.2, using 3.8 units of bovine amine oxidase. The final concentration of **3a** was adjusted to 10  $\mu$ M.

**Cell culture and MTS assay.** HeLa cells, RCB0007, were provided by the RIKEN BRC through the National Bio-Resource Project of the MEXT, Japan. HeLa cells were cultured in DMEM medium (Wako) supplemented with 10% (v/v) FBS at 37 °C in a 5% CO<sub>2</sub>-incubator. The cells were seeded on a 96-well plate (500 cells/well) in 100  $\mu$ L DMEM and incubated for 18 h. Solution containing the polyamines **1–4'** and the acrolein-modified polyamines **1a–4a'** in various concentrations were prepared in advance by diluting with the PBS(-). Fresh culture medium (95  $\mu$ L) was added to each well, and the compound solutions (5  $\mu$ L) were added. For the amine oxidase inhibition experiments, the aminoguanidine was added to the incubation solution (final concentration was adjusting to 1 mM). The treated cells were incubated for 72 h at 37 °C under a 5% CO<sub>2</sub> atmosphere. After the wells in the plates were washed twice with the cultured medium, the cell cultures in each well (100 mL medium) were supplemented with a 3-(4,5-dimethylthiazol-2-yl)-5-(3-carboxymethoxyphenyl)-2-(4-sulfophenyl)-2H-tetrazolium (MTS) solution (20 mL, Promega, CellTiter 96<sup>R</sup> Aqueous One solution cell Proliferation Assay) and then incubated for 3 h under a 5% CO<sub>2</sub> atmosphere according to the established procedure. The absorbance of each well at 450 nm was measured using a Bio-Rad Model 680 Microplate Reader.

**Western Blotting.** The HeLa cells ( $6.0 \times 10^5$ ) were seeded onto 100 mm tissue culture plates and

cultured for 18 h, followed by treatment with the acrolein-modified polyamines **1a–4a'** (60  $\mu$ M) for 48 h at 37 °C. Cells were pelleted and lysed in ice cold buffer (1% Triton X-100/50 mM  $\beta$ -glycerophosphate/1.5 mM EGTA/0.5 mM EDTA/5% glycerol/25 mM Tris HCl, pH 7.4) in the presence of a protease inhibitor cocktail (Complete; Roche Diagnostics), and the resulting lysates were cleared by centrifugation. The resulting samples were analyzed on a 4–20% gradient SDS-PAGE and then transferred to PVDF membranes. After incubation with 5% non-fat dried milk in TBS containing 0.1% Tween 20, the membranes were incubated with the anti-HO-1 antibody (ab13248, Abcam), followed by HRP-conjugated anti-mouse IgG (GE Healthcare). Protein bands were detected by treatment with Supersignal West Femto Maximum Sensitivity Substrate (Thermo Scientific) using a LAS-1000P lus•MAC analyzer (Fujifilm). After treating the PVDF membranes with the Pestore TM western Blot Stripping Buffer (Thermo Scientific), an anti-GAPDH antibody (clone 6C5/MAB374, Millipore) and an HRP-conjugated anti-mouse IgG were introduced to detect GAPDH.

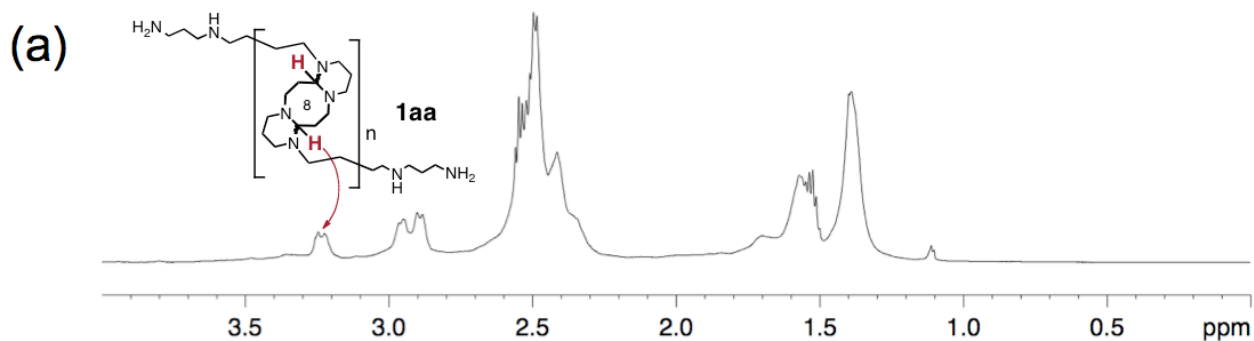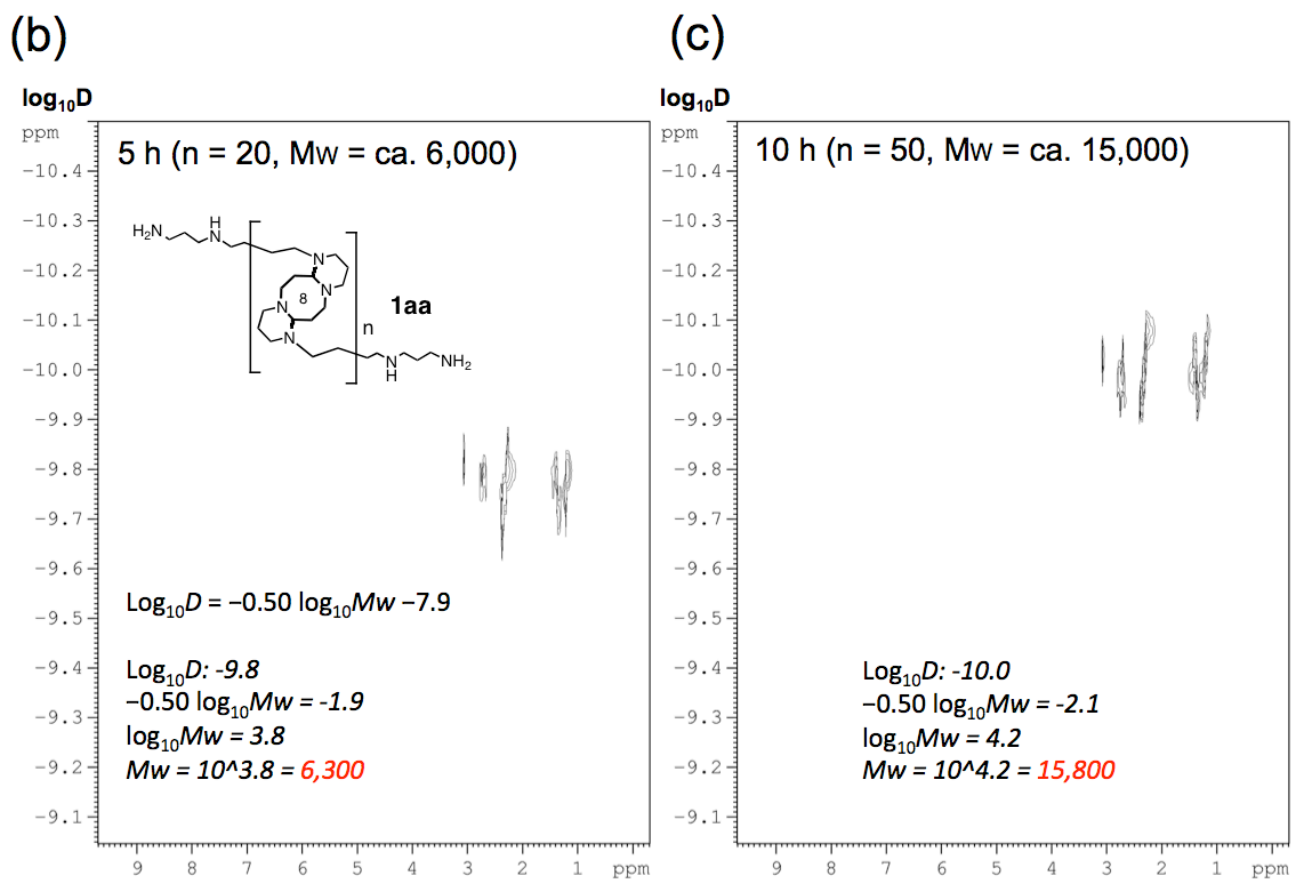

**Fig. S2** Time-dependent NMR analysis of [4+4] polymerization reaction. The reaction of spermine **1** with 2 equivalents acrolein gradually produced the 1,5-diazacyclooctane polymers **1aa** at room temperature. (a)  $^1\text{H}$  NMR in  $\text{D}_2\text{O}$  after 5 h. Diffusion ordered NMR spectroscopy (DOSY) technique estimated the polymers with average molecular weights of 6,000 after 5 h (b) and 15,000 after 10 h (c).

| compounds                                                     | IC <sub>50</sub> (μM) |                          |
|---------------------------------------------------------------|-----------------------|--------------------------|
|                                                               | IC <sub>50</sub> (μM) | (+ aminoguanidine: 1 mM) |
| spermine <b>1</b>                                             | 2.8                   | > 50                     |
| acrolein-spermine <b>1a</b>                                   | 3.0                   | > 50                     |
| <i>N</i> <sup>1</sup> -Ac-spermine <b>2</b>                   | 9.1                   | > 50                     |
| acrolein- <i>N</i> <sup>1</sup> -Ac-spermine <b>2a</b>        | 16.0                  | > 50                     |
| spermidine <b>3</b>                                           | 8.1                   | > 50                     |
| acrolein-spermidine <b>3a</b>                                 | 6.8                   | > 50                     |
| <i>N</i> <sup>1</sup> -Me-propanediamine <b>4'</b>            | > 50                  | > 50                     |
| acrolein- <i>N</i> <sup>1</sup> -Me-propanediamine <b>4a'</b> | 5.7                   | 5.8                      |

**Table S1** Cytotoxic activities of the polyamines, the 1,5-diazacyclooctanes, and the 2,6,9-triazabicyclo[3.3.1]nonane derivatives **1–4a'** on A549 cells. The cells were treated with the compounds **1–4a'** for 72 h at 37 °C, and the cytotoxicities were evaluated using the MTS method. For the amine oxidase inhibition experiments, 1 mM of the aminoguanidine was applied.
